# Supplementary material for: Finding Markers That Make a Difference: DNA Pooling and SNP-Arrays Identify Population Informative Markers for Genetic Stock Identification
Source: PubMed Central journal article supplement (PMC3864958; doi:10.1371/journal.pone.0082434), 2013-12-16
Supplement: pone.0082434.s001.pdf [file pone.0082434.s001.pdf]

# Appendix S1 for “Finding Markers that Make a Difference: DNA Pooling and SNP-arrays Identify Population Informative Markers for Genetic Stock Identification”

Mikhail Ozerov<sup>1</sup>, Anti Vasemägi<sup>2,8</sup>, Vidar Wennevik<sup>3</sup>, Rogelio Diaz-Fernandez<sup>1</sup>, Matthew Kent<sup>4</sup>, John Gilbey<sup>5</sup>, Sergey Prusov<sup>6</sup>, Eero Niemelä<sup>7</sup>, Juha-Pekka Vähä<sup>1,\*</sup>

<sup>1</sup>Kevo Subarctic Research Institute, University of Turku, Turku, Finland

<sup>2</sup>Department of Biology, Division of Genetics and Physiology, University of Turku, Turku, Finland

<sup>3</sup>Research group Population Genetics and Ecology, Institute of Marine Research, Bergen, Norway

<sup>4</sup>Department of Animal and Aquacultural Sciences, Centre for Integrative Genetics (CIGENE), Norwegian University of Life Sciences, Ås, Norway

<sup>5</sup>Freshwater Laboratory, Marine Scotland, Faskally, Pitlochry, UK

<sup>6</sup>Freshwater Resources Laboratory, Knipovitch Polar Research Institute of Marine Fisheries and Oceanography, Murmansk, Russia

<sup>7</sup>Finnish Game and Fisheries Research Institute, Oulu, Finland

<sup>8</sup>Department of Aquaculture, Institute of Veterinary Medicine and Animal Science, Estonian University of Life Sciences, Tartu, Estonia

## Table of contents:

|                                                                                                                                                                                                                                                                                                                                                             |    |
|-------------------------------------------------------------------------------------------------------------------------------------------------------------------------------------------------------------------------------------------------------------------------------------------------------------------------------------------------------------|----|
| <b>Figure S1.</b> Histograms of the genetic differentiation estimates of each of 2880 SNPs, for each selection method and population dataset (x-axis scale is method-specific). The majority of the SNPs display low to moderate estimates of genetic differentiation and only a small proportion of SNPs display high levels of population differentiation | 2  |
| <b>Figure S2.</b> Overall assignment success with 31 STRs and additional top-ranked SNPs selected by global $F_{ST}$ (dashed line), pairwise $F_{ST}$ (solid line), $\Delta$ (long dash and dotted line) and outlier methods (dataset I)                                                                                                                    | 3  |
| <b>Table S1.</b> Microsatellite loci sequencing details and genetic diversity indices: $A_T$ – total number of alleles, $A_R$ – allelic richness, $H_O$ – observed heterozygosity, $H_E$ – expected heterozygosity, $F_{ST}$ – genetic differentiation                                                                                                      | 4  |
| <b>Table S2.</b> Comparison of GSI accuracy (%) achieved using mixtures of fish with varying compositions in ONCOR [31], and using two alternative assignment approaches of Rannala & Mountain [32] and Paetkau et al. (1996). SNPs were ranked using pairwise $F_{ST}$ selection method, dataset II                                                        | 5  |
| <b>Table S3.</b> Genetic distances (Reynolds et al. 1983) among 23 Atlantic salmon populations estimated on the basis of 2880 SNP (above diagonal) and 31 STR (below diagonal) markers                                                                                                                                                                      | 6  |
| <b>Table S4.</b> Overall assignment success (%) for 50 and 100 top SNPs identified using different approaches depending on the population dataset                                                                                                                                                                                                           | 7  |
| <b>Table S5.</b> GSI accuracy (%) in individual population                                                                                                                                                                                                                                                                                                  | 8  |
| <b>Table S6.</b> GSI accuracy (%) of SNPs ranked using pairwise $F_{ST}$ (dataset II) tested on 26 independent individual populations (DRYAD entry doi:10.5061/dryad.gm367, Bourret et al. 2012)                                                                                                                                                            | 13 |
| <b>Table S7.</b> Estimated number of SNPs required to achieve 80%, 90%, 95% and 98% overall correct assignments for independent dataset of 26 European Atlantic salmon populations                                                                                                                                                                          | 14 |

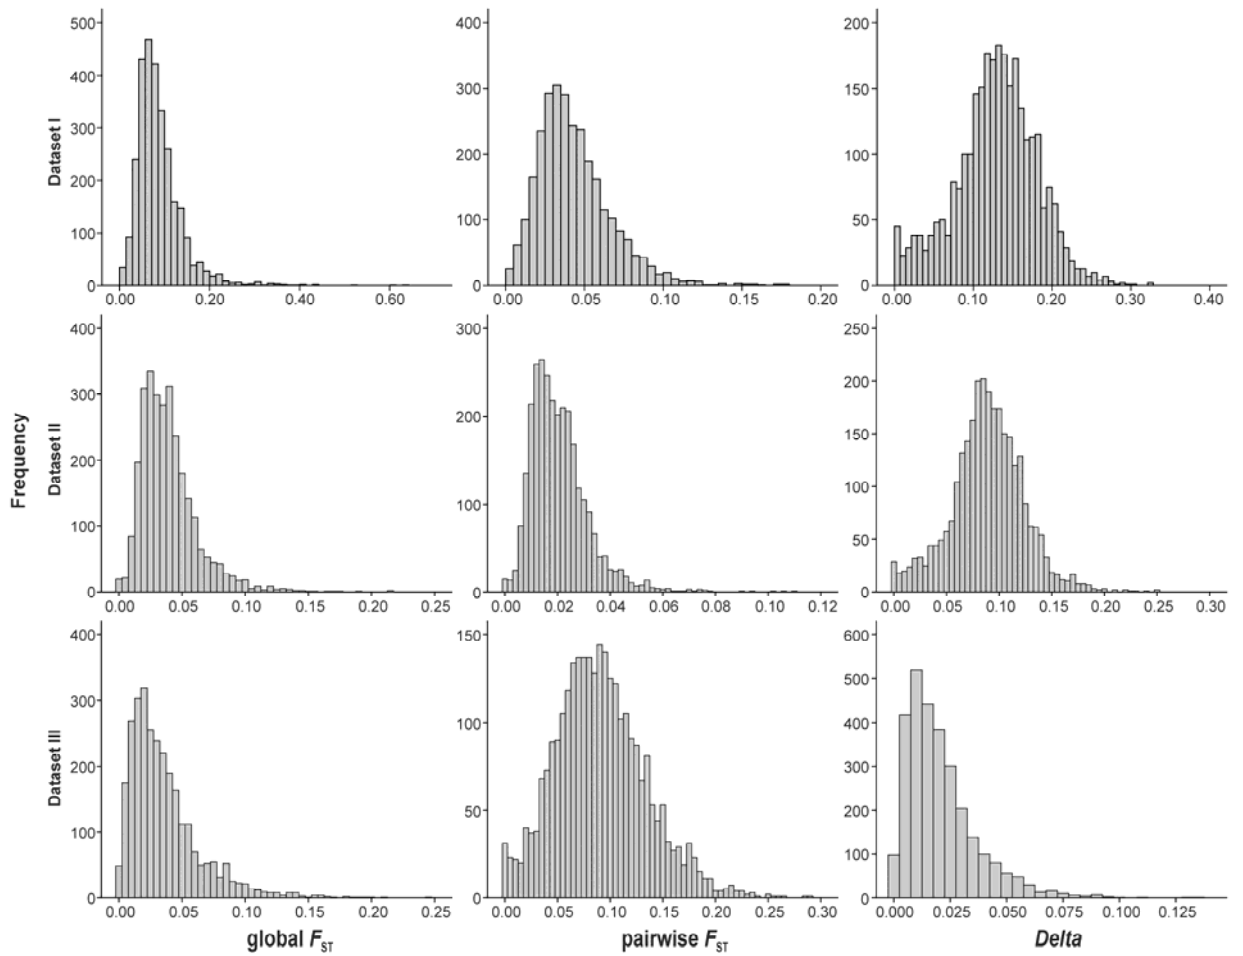

**Figure S1.** Histograms of the genetic differentiation estimates of each of 2880 SNPs, for each selection method and population dataset (x-axis scale is method-specific). The majority of the SNPs display low to moderate estimates of genetic differentiation and only a small proportion of SNPs display high levels of population differentiation.

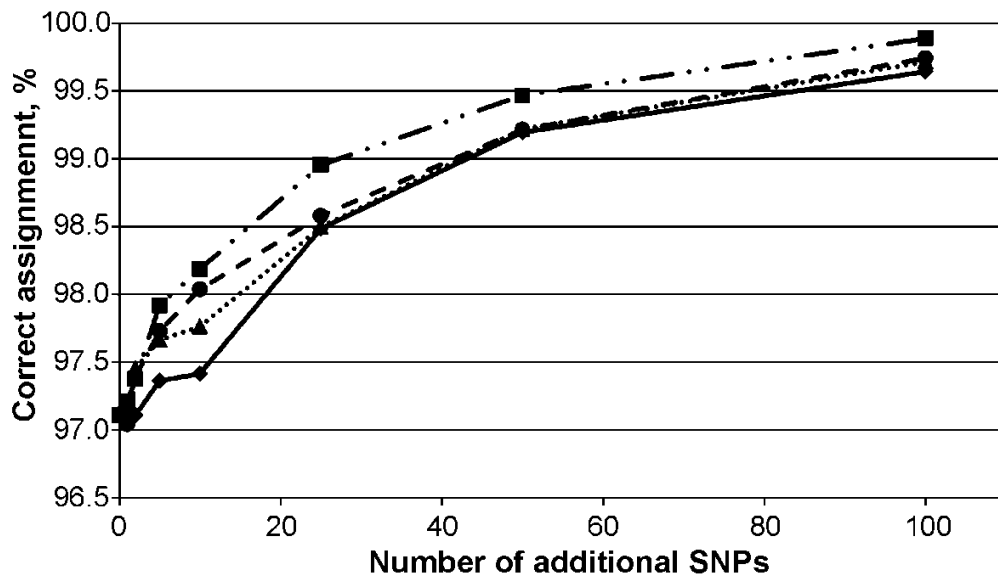

**Figure S2.** Overall assignment success with 31 STRs and additional top-ranked SNPs selected by global  $F_{ST}$  (dashed line), pairwise  $F_{ST}$  (solid line),  $\Delta$  (long dash and dotted line) and outlier methods (dataset I).

**Table S1.** Microsatellite loci sequencing details and genetic diversity indices:  $A_T$  – total number of alleles,  $A_R$  – allelic richness,  $H_O$  – observed heterozygosity,  $H_E$  – expected heterozygosity,  $F_{ST}$  – genetic differentiation.

| Marker     | Reference             | Primer sequences                                                | $A_T$ | $A_R$ | $H_O$ | $H_E$ | $F_{ST}$ |
|------------|-----------------------|-----------------------------------------------------------------|-------|-------|-------|-------|----------|
| SSsp2215   | Patterson et al. 2004 | F: GGTCAGTCAGTCACACCATGC<br>R: GTTTAGGTGTCCTGCCGGTCAAT          | 27    | 16.96 | 0.89  | 0.89  | 0.040    |
| Ssa171     | O'Reilly et al. 1996  | F: ATTATCCAAAAGGGGTCAAAA<br>R: GTTTGAGGTGCTGGGGTTACTAT          | 27    | 12.20 | 0.82  | 0.81  | 0.055    |
| SSsp2216   | Patterson et al. 2004 | F: CTCCTCCTGGGATTTCTGTCA<br>R: GTTCTGGAGCAGAGGATTGCTG           | 21    | 14.03 | 0.87  | 0.87  | 0.035    |
| Ssa289     | McConnell et al. 1995 | F: GTCATACAGTCACTATCATC<br>R: GTTCTTTACAAATAGACAGACT            | 11    | 4.47  | 0.62  | 0.63  | 0.065    |
| Ssa14      | McConnell et al. 1995 | F: CCTTTTGACAGATTTAGGATTTTC<br>R: GTTCAAACCAAACATACCTAAAGCC     | 5     | 2.26  | 0.44  | 0.43  | 0.115    |
| Ssa197     | O'Reilly et al. 1996  | F: TGGCAGGGATTTGACATAAC<br>R: GGGTTGAGTAGGGAGGCTTG              | 30    | 17.58 | 0.89  | 0.90  | 0.038    |
| Ssa412     | Cairney et al. 2000   | F: GTGGAGATACACAGCACTTA<br>R: GTTCTTGTTAGTACCGACATG             | 9     | 3.77  | 0.54  | 0.54  | 0.144    |
| EST107     | Vasemägi et al. 2005  | F: AGCGTTACGTCGAATCCAA<br>R: GTTCTCATGGAGGGTGAAGTGT             | 8     | 5.13  | 0.61  | 0.61  | 0.063    |
| SSf43      | Sánchez et al. 1996   | F: GAGTCACTCAAAGTGAGGCC<br>R: GTTTAGCGGCATAACGTGCTGTGT          | 12    | 4.73  | 0.34  | 0.34  | 0.045    |
| Ssosl25    | Slettan et al. 1995   | F: ATCTACACAGCTCCTGGTGGCAG<br>R: GTTTCATGTAATGGGTGAGAGAAGTG     | 17    | 7.98  | 0.74  | 0.74  | 0.073    |
| Ssa98      | O'Reilly et al. 1996  | F: GCAGTCCTTACCTGTGTGATTA<br>R: GTTTGGTAGTGTATCTGGAGAGTGC       | 13    | 6.79  | 0.37  | 0.38  | 0.046    |
| Ssa202     | O'Reilly et al. 1996  | F: TTCATGTGTTAATGTTGCGTG<br>R: GTTCTTGGAATATCTAGAATATGGC        | 16    | 10.65 | 0.85  | 0.83  | 0.052    |
| SSA405     | Cairney et al. 2000   | F: CTGAGTGGGAATGGACCAGACA<br>R: GTTTACTCGGGAGGCCAGACTTGAT       | 28    | 20.37 | 0.91  | 0.92  | 0.024    |
| SSsp3016   | AY372820              | F: GACAGGGCTAAGTCAGGTCA<br>R: GATTCTTATATACTTATCCCCAT           | 19    | 12.88 | 0.77  | 0.78  | 0.063    |
| SsaD486    | King et al. 2005      | F: ACTCGGATAACACTCACAGGTC<br>R: GTT(T)CGCTGTGTATCAGTATTTTGG     | 5     | 1.37  | 0.01  | 0.01  | 0.025    |
| EST68      | Vasemägi et al. 2005  | F: TGACACTGTGGCCTGTCTCT<br>R: GTTTGAGTTCTGGGTTATTTATTCACA       | 8     | 6.31  | 0.59  | 0.61  | 0.070    |
| MHCII      | Stet et al. 2002      | F: GATGGCAAAGAGGAAAAGTGAG<br>R: GTTTGTTATGCTCTACCTCTGAA         | 16    | 9.02  | 0.74  | 0.72  | 0.115    |
| MHC I      | Grimholt et al. 2002  | F: __GAAGGTGCTGAAGAGGAACGTC<br>R: GTTTCAATTACCACAAGCCCGCTC      | 19    | 12.15 | 0.80  | 0.80  | 0.08     |
| Sleel53    | U86704                | F: TGATTTGTTGCCTGCTGCTTCC<br>R: GTTCCCTGCTGCCACATCTCC           | 6     | 4.08  | 0.55  | 0.55  | 0.091    |
| Ssleer15.1 | U86708                | F: CATGTGCGTGTGCTTTTACAG<br>R: GTTTTCTGCATGTAGAACCCTGACC        | 5     | 4.12  | 0.60  | 0.63  | 0.080    |
| Sleen82    | U86706                | F: CATGGAGAATCCCACCTTTTA<br>R: GTTTCAGGGAGTGATATGGGACATAA       | 11    | 7.10  | 0.72  | 0.72  | 0.065    |
| SSsp2201   | Patterson et al. 2004 | F: TTAGATGTGGGATACTGGGAGGC<br>R: GTTTCGGGAGCCCATAAACCTACTAATAAC | 36    | 21.64 | 0.93  | 0.93  | 0.019    |
| SSspG7     | Patterson et al. 2004 | F: CTGGTCCCGTTCTTACGACAACC<br>R: GTTTGCACGCTGCTTGGTCCTTG        | 22    | 14.28 | 0.83  | 0.82  | 0.046    |
| SSsp1605   | Patterson et al. 2004 | F: TCTGAGGCTCCTTCTACACTGA<br>R: GTTTGGTAGGTGCAAGAAAAAAGGAC      | 11    | 7.47  | 0.77  | 0.76  | 0.067    |
| EST19      | Vasemägi et al. 2005  | F: CGCTTCTGGACAAAAATTA<br>R: GTTTCATCTCTGTCACTTCTCTTGC          | 37    | 19.36 | 0.86  | 0.88  | 0.050    |
| SSsp2210   | Patterson et al. 2004 | F: CCTTTTCCAATGGGATTCA<br>R: GTTTCATGCACACACATTCACTGC           | 15    | 9.92  | 0.77  | 0.77  | 0.068    |
| Ssosl85    | Slettan et al. 1995   | F: TGTGGATTTTGTATTATGTTA<br>R: GTTTATACATTTCTCTCATTTCAG         | 21    | 11.05 | 0.77  | 0.78  | 0.059    |
| Ssa407     | Cairney et al. 2000   | F: TCGTGACTACTAAGTCTTTGACCA<br>R: GTTTGTGTAGGCAGGTGTGGAC        | 33    | 16.78 | 0.85  | 0.88  | 0.025    |
| EST28      | Vasemägi et al. 2005  | F: CACAGGCACACACTCCTCAT<br>R: GTTTCAGGTGAAGAGCATGACCAA          | 13    | 4.49  | 0.33  | 0.32  | 0.039    |
| SsaD144    | King et al. 2005      | F: TCAATTGTTGGGTGCACATAG<br>R: GTTTGTGAAGGGGTGACTAAC            | 35    | 24.11 | 0.93  | 0.93  | 0.029    |
| SsaD157    | King et al. 2005      | F: GCTTAGGGCTGAGAGAGGAATAC<br>R: GTTTATCGAAATGGAACTTTGAATG      | 31    | 18.97 | 0.91  | 0.92  | 0.020    |

**Table S2.** Comparison of GSI accuracy (%) achieved using mixtures of fish with varying compositions in ONCOR [31], and using two alternative assignment approaches of Rannala & Mountain [32] and Paetkau et al. (1996). SNPs were ranked using pairwise  $F_{ST}$  selection method, dataset II.

|     | <b>Equally<br/>sized<br/>mixture</b> | <b>Mixture 1</b> | <b>Mixture 2</b> | <b>Mixture 3</b> | <b>Rannala &amp;<br/>Mountain</b> | <b>Paetkau et<br/>al.</b> |
|-----|--------------------------------------|------------------|------------------|------------------|-----------------------------------|---------------------------|
| 25  | 0.59                                 | 0.58             | 0.59             | 0.56             | 0.55                              | 0.55                      |
| 50  | 0.82                                 | 0.80             | 0.80             | 0.80             | 0.82                              | 0.83                      |
| 75  | 0.89                                 | 0.88             | 0.89             | 0.90             | 0.90                              | 0.91                      |
| 100 | 0.94                                 | 0.94             | 0.94             | 0.93             | 0.94                              | 0.95                      |

**Table S3.** Genetic distances (Reynolds et al. 1983) among 23 Atlantic salmon populations estimated on the basis of 2880 SNP (above diagonal) and 31 STR (below diagonal) markers.

| Populations      | Laukhelle | Målselva | Reisa | Alta  | Repparfjordelv | Lakselva | Iesjoki | Karasjoki | Inarijoki | Tana Bru | Yläkönäs | Vestre Jakobselv | Neiden | Titovka | Ura   | Kola  | Pechora Pizhma | Pechora Unya | Ponoi | Varzuga | Mezen Pizhma | Onega | Narva |
|------------------|-----------|----------|-------|-------|----------------|----------|---------|-----------|-----------|----------|----------|------------------|--------|---------|-------|-------|----------------|--------------|-------|---------|--------------|-------|-------|
| Laukhelle        | -         | 0.039    | 0.066 | 0.063 | 0.037          | 0.056    | 0.060   | 0.057     | 0.056     | 0.051    | 0.055    | 0.036            | 0.049  | 0.034   | 0.047 | 0.051 | 0.145          | 0.173        | 0.075 | 0.095   | 0.158        | 0.119 | 0.188 |
| Målselva         | 0.035     | -        | 0.033 | 0.035 | 0.033          | 0.046    | 0.046   | 0.057     | 0.053     | 0.047    | 0.040    | 0.034            | 0.050  | 0.040   | 0.051 | 0.054 | 0.146          | 0.173        | 0.084 | 0.106   | 0.159        | 0.121 | 0.185 |
| Reisa            | 0.057     | 0.030    | -     | 0.028 | 0.039          | 0.048    | 0.045   | 0.061     | 0.059     | 0.051    | 0.039    | 0.044            | 0.056  | 0.052   | 0.061 | 0.062 | 0.158          | 0.185        | 0.096 | 0.118   | 0.177        | 0.135 | 0.207 |
| Alta             | 0.042     | 0.028    | 0.031 | -     | 0.030          | 0.038    | 0.046   | 0.059     | 0.055     | 0.044    | 0.037    | 0.034            | 0.051  | 0.047   | 0.056 | 0.058 | 0.156          | 0.183        | 0.091 | 0.114   | 0.172        | 0.135 | 0.208 |
| Repparfjordelv   | 0.030     | 0.020    | 0.031 | 0.022 | -              | 0.032    | 0.036   | 0.033     | 0.029     | 0.024    | 0.028    | 0.020            | 0.029  | 0.022   | 0.030 | 0.035 | 0.142          | 0.168        | 0.062 | 0.084   | 0.152        | 0.117 | 0.192 |
| Lakselva         | 0.048     | 0.036    | 0.040 | 0.026 | 0.030          | -        | 0.060   | 0.059     | 0.055     | 0.046    | 0.051    | 0.036            | 0.052  | 0.045   | 0.056 | 0.059 | 0.163          | 0.191        | 0.088 | 0.111   | 0.175        | 0.140 | 0.215 |
| Iesjoki          | 0.045     | 0.041    | 0.051 | 0.046 | 0.023          | 0.056    | -       | 0.032     | 0.035     | 0.037    | 0.024    | 0.041            | 0.035  | 0.035   | 0.039 | 0.040 | 0.144          | 0.173        | 0.076 | 0.097   | 0.158        | 0.118 | 0.199 |
| Karasjoki        | 0.051     | 0.056    | 0.061 | 0.056 | 0.034          | 0.067    | 0.023   | -         | 0.030     | 0.034    | 0.033    | 0.039            | 0.033  | 0.032   | 0.038 | 0.040 | 0.153          | 0.181        | 0.071 | 0.095   | 0.167        | 0.130 | 0.209 |
| Inarijoki        | 0.040     | 0.043    | 0.049 | 0.046 | 0.026          | 0.052    | 0.025   | 0.030     | -         | 0.030    | 0.029    | 0.037            | 0.033  | 0.030   | 0.036 | 0.039 | 0.153          | 0.178        | 0.069 | 0.092   | 0.163        | 0.127 | 0.208 |
| Tana Bru         | 0.056     | 0.051    | 0.059 | 0.050 | 0.028          | 0.054    | 0.035   | 0.040     | 0.036     | -        | 0.023    | 0.031            | 0.029  | 0.027   | 0.035 | 0.039 | 0.151          | 0.177        | 0.068 | 0.091   | 0.156        | 0.126 | 0.204 |
| Yläkönäs         | 0.040     | 0.038    | 0.048 | 0.040 | 0.019          | 0.044    | 0.025   | 0.033     | 0.024     | 0.017    | -        | 0.034            | 0.032  | 0.031   | 0.039 | 0.040 | 0.144          | 0.171        | 0.075 | 0.097   | 0.156        | 0.120 | 0.195 |
| Vestre Jakobselv | 0.038     | 0.031    | 0.040 | 0.023 | 0.022          | 0.033    | 0.040   | 0.051     | 0.040     | 0.044    | 0.034    | -                | 0.033  | 0.025   | 0.033 | 0.038 | 0.141          | 0.167        | 0.065 | 0.086   | 0.153        | 0.115 | 0.194 |
| Neiden           | 0.043     | 0.043    | 0.049 | 0.036 | 0.028          | 0.051    | 0.032   | 0.037     | 0.030     | 0.037    | 0.031    | 0.031            | -      | 0.018   | 0.023 | 0.029 | 0.142          | 0.170        | 0.058 | 0.081   | 0.151        | 0.116 | 0.199 |
| Titovka          | 0.030     | 0.031    | 0.044 | 0.032 | 0.022          | 0.041    | 0.026   | 0.033     | 0.026     | 0.037    | 0.026    | 0.026            | 0.020  | -       | 0.016 | 0.019 | 0.125          | 0.153        | 0.040 | 0.060   | 0.133        | 0.100 | 0.183 |
| Ura              | 0.039     | 0.040    | 0.049 | 0.037 | 0.027          | 0.048    | 0.030   | 0.037     | 0.031     | 0.038    | 0.029    | 0.029            | 0.022  | 0.017   | -     | 0.025 | 0.134          | 0.162        | 0.046 | 0.066   | 0.142        | 0.108 | 0.194 |
| Kola             | 0.042     | 0.042    | 0.054 | 0.045 | 0.033          | 0.052    | 0.030   | 0.040     | 0.035     | 0.044    | 0.038    | 0.040            | 0.033  | 0.019   | 0.025 | -     | 0.126          | 0.155        | 0.037 | 0.054   | 0.131        | 0.097 | 0.192 |
| Pechora Pizhma   | 0.113     | 0.116    | 0.122 | 0.104 | 0.098          | 0.118    | 0.106   | 0.110     | 0.114     | 0.108    | 0.105    | 0.103            | 0.092  | 0.097   | 0.096 | 0.094 | -              | 0.079        | 0.133 | 0.149   | 0.198        | 0.102 | 0.276 |
| Pechora Unya     | 0.116     | 0.120    | 0.130 | 0.113 | 0.104          | 0.125    | 0.118   | 0.123     | 0.124     | 0.120    | 0.114    | 0.111            | 0.107  | 0.106   | 0.106 | 0.101 | 0.070          | -            | 0.163 | 0.179   | 0.235        | 0.142 | 0.303 |
| Ponoi            | 0.060     | 0.054    | 0.064 | 0.060 | 0.044          | 0.063    | 0.042   | 0.054     | 0.048     | 0.048    | 0.042    | 0.048            | 0.044  | 0.030   | 0.034 | 0.031 | 0.096          | 0.095        | -     | 0.026   | 0.130        | 0.102 | 0.219 |
| Varzuga          | 0.060     | 0.067    | 0.073 | 0.064 | 0.057          | 0.068    | 0.051   | 0.060     | 0.053     | 0.068    | 0.057    | 0.058            | 0.055  | 0.035   | 0.046 | 0.032 | 0.108          | 0.109        | 0.026 | -       | 0.144        | 0.117 | 0.238 |
| Mezen Pizhma     | 0.093     | 0.084    | 0.095 | 0.076 | 0.075          | 0.094    | 0.077   | 0.088     | 0.083     | 0.081    | 0.074    | 0.076            | 0.067  | 0.062   | 0.070 | 0.066 | 0.078          | 0.102        | 0.062 | 0.082   | -            | 0.140 | 0.290 |
| Onega            | 0.115     | 0.110    | 0.123 | 0.124 | 0.103          | 0.130    | 0.096   | 0.114     | 0.111     | 0.111    | 0.105    | 0.106            | 0.101  | 0.082   | 0.086 | 0.077 | 0.143          | 0.151        | 0.069 | 0.087   | 0.097        | -     | 0.243 |
| Narva            | 0.123     | 0.123    | 0.134 | 0.118 | 0.116          | 0.125    | 0.129   | 0.137     | 0.129     | 0.131    | 0.123    | 0.124            | 0.125  | 0.110   | 0.121 | 0.117 | 0.189          | 0.200        | 0.131 | 0.141   | 0.166        | 0.183 | -     |

**Table S4.** Overall assignment success (%) for 50 and 100 top SNPs identified using different approaches depending on the population dataset.

|             | <b>Ranking approach</b> |                   |          |         |                      |
|-------------|-------------------------|-------------------|----------|---------|----------------------|
|             | global $F_{ST}$         | pairwise $F_{ST}$ | $\Delta$ | Outlier | Random*              |
| 100         |                         |                   |          |         |                      |
| Dataset I   | 88.97                   | 90.21             | 90.71    | 94.40   | 80.12 ( $\pm 1.02$ ) |
| Dataset II  | 94.15                   | 94.40             | 93.68    | 95.13   | 80.12 ( $\pm 1.02$ ) |
| Dataset III | 92.69                   | 94.24             | 92.17    | n/a     | 80.12 ( $\pm 1.02$ ) |
| 50          |                         |                   |          |         |                      |
| Dataset I   | 67.26                   | 71.29             | 73.97    | 80.05   | 59.43 ( $\pm 2.27$ ) |
| Dataset II  | 77.48                   | 81.53             | 79.54    | 79.94   | 59.43 ( $\pm 2.27$ ) |
| Dataset III | 75.10                   | 78.64             | 75.35    | n/a     | 59.43 ( $\pm 2.27$ ) |

\*Averaged across 5 tests (standard deviation is shown in brackets)

**Table S5.** GSI accuracy (%) in individual populations.

| Population     | No of SNPs | Population dataset I |                   |       |         | Population dataset II |                   |        |         | Population dataset III |                   |        |         | Random SNPs |
|----------------|------------|----------------------|-------------------|-------|---------|-----------------------|-------------------|--------|---------|------------------------|-------------------|--------|---------|-------------|
|                |            | global $F_{ST}$      | pairwise $F_{ST}$ | Delta | outlier | global $F_{ST}$       | pairwise $F_{ST}$ | Delta  | outlier | global $F_{ST}$        | pairwise $F_{ST}$ | Delta  | outlier |             |
| Laukhelle      | 25         | 72.40                | 68.40             | 59.09 | 69.41   | 88.92                 | 79.55             | 77.17  | 79.39   | 94.74                  | 91.39             | 83.67  | 85.35   | 37.22       |
|                | 50         | 82.69                | 82.48             | 86.27 | 92.82   | 99.18                 | 96.13             | 94.83  | 93.36   | 98.49                  | 97.86             | 95.70  |         | 69.67       |
|                | 75         | 94.42                | 93.40             | 90.95 | 97.12   | 99.41                 | 98.40             | 98.39  | 97.86   | 99.91                  | 98.83             | 98.26  |         | 84.86       |
|                | 100        | 96.27                | 97.63             | 94.85 | 98.47   | 99.78                 | 99.91             | 99.77  |         | 99.99                  | 99.97             | 99.49  |         | 81.85       |
|                | 125        | 98.79                | 99.12             | 98.27 |         | 100.00                | 99.92             | 99.95  |         | 100.00                 | 99.97             | 99.94  |         | 94.10       |
|                | 150        | 99.62                | 99.30             | 99.59 |         | 99.96                 | 99.98             | 99.85  |         | 100.00                 | 100.00            | 99.99  |         | 96.99       |
|                | 200        | 99.96                | 99.70             | 99.78 |         | 100.00                | 100.00            | 99.99  |         | 100.00                 | 100.00            | 99.99  |         | 99.87       |
|                | 250        | 100.00               | 99.99             | 99.77 |         | 100.00                | 100.00            | 100.00 |         | 100.00                 | 100.00            | 100.00 |         | 99.57       |
| 300            | 99.99      | 100.00               | 100.00            |       | 100.00  | 100.00                | 100.00            |        | 100.00  | 100.00                 | 100.00            |        | 99.90   |             |
| Målselva       | 25         | 35.08                | 37.81             | 50.87 | 55.99   | 72.74                 | 66.11             | 63.33  | 59.68   | 69.19                  | 65.56             | 52.58  | 62.96   | 24.42       |
|                | 50         | 62.73                | 72.40             | 76.67 | 83.85   | 93.04                 | 89.90             | 87.43  | 88.74   | 90.93                  | 89.74             | 81.42  |         | 50.65       |
|                | 75         | 80.16                | 89.58             | 86.11 | 95.60   | 98.92                 | 96.34             | 95.32  | 95.38   | 94.61                  | 97.47             | 92.42  |         | 66.73       |
|                | 100        | 91.26                | 96.47             | 95.34 | 98.14   | 99.20                 | 98.55             | 98.55  |         | 99.10                  | 98.19             | 97.28  |         | 76.94       |
|                | 125        | 97.33                | 97.41             | 95.69 |         | 99.93                 | 99.82             | 99.45  |         | 99.21                  | 99.63             | 97.55  |         | 83.94       |
|                | 150        | 99.31                | 99.45             | 98.89 |         | 99.86                 | 99.85             | 99.39  |         | 99.81                  | 99.43             | 99.15  |         | 92.82       |
|                | 200        | 99.97                | 99.37             | 99.60 |         | 99.99                 | 99.98             | 99.57  |         | 99.88                  | 99.72             | 99.87  |         | 97.08       |
|                | 250        | 99.80                | 99.50             | 99.99 |         | 100.00                | 100.00            | 100.00 |         | 100.00                 | 99.82             | 99.70  |         | 99.24       |
| 300            | 100.00     | 100.00               | 99.96             |       | 100.00  | 100.00                | 100.00            |        | 100.00  | 100.00                 | 99.94             |        | 99.83   |             |
| Reisa          | 25         | 48.27                | 57.12             | 60.47 | 52.48   | 60.94                 | 57.64             | 59.90  | 63.47   | 60.67                  | 80.20             | 79.77  | 59.80   | 20.08       |
|                | 50         | 66.37                | 71.45             | 78.35 | 78.38   | 84.20                 | 85.66             | 80.40  | 80.59   | 91.18                  | 94.32             | 93.30  |         | 64.15       |
|                | 75         | 78.69                | 84.77             | 86.89 | 90.23   | 94.64                 | 94.28             | 91.68  | 92.17   | 95.06                  | 98.23             | 97.25  |         | 75.19       |
|                | 100        | 89.31                | 94.93             | 93.28 | 96.15   | 98.10                 | 98.11             | 97.12  |         | 98.68                  | 99.36             | 97.84  |         | 87.31       |
|                | 125        | 96.70                | 97.26             | 96.71 |         | 99.29                 | 98.82             | 99.30  |         | 99.36                  | 99.62             | 98.85  |         | 90.70       |
|                | 150        | 96.84                | 97.74             | 98.13 |         | 99.38                 | 99.60             | 99.14  |         | 99.38                  | 99.86             | 99.82  |         | 92.27       |
|                | 200        | 99.31                | 99.42             | 99.11 |         | 99.60                 | 99.99             | 99.72  |         | 100.00                 | 99.94             | 99.81  |         | 96.16       |
|                | 250        | 99.27                | 99.61             | 99.73 |         | 100.00                | 100.00            | 99.97  |         | 99.99                  | 100.00            | 100.00 |         | 99.24       |
| 300            | 99.83      | 99.99                | 99.76             |       | 99.99   | 99.98                 | 99.99             |        | 99.99   | 100.00                 | 99.99             |        | 99.63   |             |
| Alta           | 25         | 35.64                | 44.81             | 46.40 | 60.88   | 61.28                 | 71.21             | 71.88  | 67.04   | 57.64                  | 69.91             | 62.26  | 64.88   | 25.58       |
|                | 50         | 62.70                | 71.84             | 75.04 | 77.18   | 85.79                 | 88.91             | 87.67  | 81.61   | 83.67                  | 86.32             | 87.56  |         | 48.78       |
|                | 75         | 74.63                | 80.61             | 85.68 | 91.14   | 94.85                 | 95.42             | 93.95  | 91.33   | 91.59                  | 96.53             | 96.17  |         | 69.52       |
|                | 100        | 86.44                | 94.89             | 92.63 | 94.42   | 97.57                 | 97.45             | 97.44  |         | 96.49                  | 97.74             | 95.95  |         | 81.55       |
|                | 125        | 95.07                | 96.08             | 94.59 |         | 98.78                 | 99.09             | 98.77  |         | 98.28                  | 99.32             | 97.61  |         | 86.53       |
|                | 150        | 97.71                | 97.69             | 97.94 |         | 99.38                 | 99.52             | 99.16  |         | 99.27                  | 99.65             | 99.13  |         | 89.31       |
|                | 200        | 98.61                | 99.24             | 98.85 |         | 99.80                 | 99.89             | 99.79  |         | 99.66                  | 99.68             | 99.94  |         | 97.17       |
|                | 250        | 99.63                | 99.66             | 99.42 |         | 100.00                | 99.99             | 100.00 |         | 99.68                  | 99.96             | 99.92  |         | 98.93       |
| 300            | 99.91      | 99.99                | 99.77             |       | 100.00  | 99.99                 | 99.99             |        | 100.00  | 99.95                  | 99.99             |        | 99.80   |             |
| Repparfjordelv | 25         | 22.09                | 29.22             | 31.70 | 39.72   | 38.75                 | 53.57             | 37.88  | 50.85   | 31.74                  | 34.53             | 30.44  | 47.62   | 16.57       |
|                | 50         | 44.93                | 52.26             | 53.81 | 73.19   | 66.70                 | 69.40             | 71.19  | 77.62   | 60.16                  | 64.79             | 58.63  |         | 33.47       |
|                | 75         | 60.53                | 70.00             | 68.48 | 85.17   | 84.94                 | 81.57             | 80.22  | 90.77   | 77.46                  | 82.59             | 80.71  |         | 45.34       |
|                | 100        | 78.53                | 81.55             | 83.21 | 91.24   | 91.76                 | 91.40             | 88.83  |         | 84.54                  | 89.87             | 85.45  |         | 66.90       |
|                | 125        | 86.21                | 85.44             | 89.81 |         | 94.54                 | 94.65             | 93.39  |         | 91.51                  | 92.45             | 93.56  |         | 71.01       |
|                | 150        | 91.72                | 92.78             | 93.61 |         | 97.80                 | 97.57             | 95.97  |         | 95.79                  | 95.14             | 96.18  |         | 83.30       |
|                | 200        | 94.60                | 96.88             | 96.03 |         | 99.06                 | 99.61             | 98.38  |         | 98.09                  | 98.72             | 98.60  |         | 90.36       |
|                | 250        | 98.63                | 98.67             | 98.44 |         | 99.88                 | 99.83             | 98.96  |         | 99.14                  | 99.54             | 99.11  |         | 95.15       |
| 300            | 99.57      | 99.57                | 99.50             |       | 99.98   | 99.97                 | 99.54             |        | 99.94   | 99.83                  | 99.10             |        | 98.21   |             |
| Lakselva       | 25         | 31.83                | 46.59             | 49.87 | 59.37   | 71.71                 | 66.17             | 60.52  | 66.92   | 31.65                  | 59.38             | 43.49  | 59.20   | 18.79       |
|                | 50         | 62.46                | 73.73             | 81.61 | 87.04   | 86.37                 | 88.37             | 81.26  | 88.63   | 78.89                  | 84.16             | 75.75  |         | 63.41       |
|                | 75         | 83.20                | 90.56             | 87.99 | 93.77   | 96.47                 | 96.99             | 95.01  | 95.86   | 86.29                  | 91.82             | 90.62  |         | 68.38       |
|                | 100        | 95.56                | 95.46             | 94.92 | 96.69   | 98.68                 | 99.12             | 97.61  |         | 93.86                  | 95.97             | 93.73  |         | 86.68       |
|                | 125        | 97.90                | 96.59             | 98.30 |         | 99.30                 | 99.74             | 98.76  |         | 97.45                  | 98.12             | 95.05  |         | 87.84       |
|                | 150        | 99.03                | 98.23             | 98.69 |         | 99.82                 | 99.74             | 99.53  |         | 99.06                  | 98.86             | 98.41  |         | 93.74       |
|                | 200        | 99.89                | 99.55             | 99.75 |         | 100.00                | 100.00            | 99.91  |         | 99.71                  | 99.67             | 99.40  |         | 97.65       |
|                | 250        | 99.63                | 99.87             | 99.99 |         | 99.99                 | 100.00            | 100.00 |         | 99.95                  | 99.74             | 99.98  |         | 99.75       |
| 300            | 100.00     | 100.00               | 99.87             |       | 100.00  | 100.00                | 99.94             |        | 99.97   | 100.00                 | 99.93             |        | 99.98   |             |
| Iesjoki        | 25         | 28.67                | 31.90             | 23.36 | 53.35   | 38.18                 | 43.92             | 46.14  | 55.61   | 24.93                  | 34.41             | 26.47  | 43.19   | 19.63       |
|                | 50         | 55.27                | 49.47             | 54.93 | 79.10   | 77.10                 | 85.74             | 84.21  | 77.87   | 62.60                  | 69.43             | 59.35  |         | 41.35       |
|                | 75         | 74.56                | 70.59             | 74.15 | 91.40   | 89.64                 | 94.25             | 91.87  | 91.30   | 83.00                  | 88.05             | 82.97  |         | 69.43       |
|                | 100        | 82.87                | 80.90             | 85.19 | 95.50   | 97.91                 | 97.47             | 95.64  |         | 91.79                  | 96.57             | 90.77  |         | 79.71       |
|                | 125        | 89.49                | 93.59             | 95.32 |         | 97.94                 | 99.01             | 98.02  |         | 94.70                  | 97.24             | 95.91  |         | 88.10       |
|                | 150        | 95.30                | 96.34             | 97.13 |         | 99.68                 | 99.59             | 98.95  |         | 97.01                  | 99.31             | 97.47  |         | 91.45       |
|                | 200        | 98.51                | 99.19             | 99.27 |         | 99.98                 | 99.99             | 99.84  |         | 99.60                  | 99.72             | 99.30  |         | 96.52       |
|                | 250        | 98.86                | 99.77             | 99.44 |         | 99.91                 | 99.99             | 99.90  |         | 99.79                  | 99.95             | 99.73  |         | 98.34       |
| 300            | 99.96      | 99.84                | 99.98             |       | 100.00  | 100.00                | 99.91             |        | 99.77   | 100.00                 | 99.93             |        | 98.92   |             |



**Table S5.** GSI accuracy (%) in individual populations (cont.).

| Population       | No of SNPs | Population dataset I |                   |          |         | Population dataset II |                   |          |         | Population dataset III |                   |          |         | Random SNPs |
|------------------|------------|----------------------|-------------------|----------|---------|-----------------------|-------------------|----------|---------|------------------------|-------------------|----------|---------|-------------|
|                  |            | global $F_{ST}$      | pairwise $F_{ST}$ | $\Delta$ | Outlier | global $F_{ST}$       | pairwise $F_{ST}$ | $\Delta$ | Outlier | global $F_{ST}$        | pairwise $F_{ST}$ | $\Delta$ | Outlier |             |
| Karasjoki        | 25         | 32.45                | 38.94             | 45.95    | 34.50   | 31.56                 | 34.07             | 33.04    | 30.76   | 25.42                  | 35.50             | 32.01    | 27.08   | 21.48       |
|                  | 50         | 52.11                | 54.23             | 62.58    | 58.55   | 65.44                 | 70.75             | 71.43    | 64.66   | 54.73                  | 57.13             | 55.50    |         | 50.61       |
|                  | 75         | 65.46                | 74.77             | 77.59    | 76.87   | 79.30                 | 84.64             | 83.13    | 86.00   | 68.17                  | 80.48             | 73.28    |         | 62.58       |
|                  | 100        | 81.81                | 82.29             | 90.64    | 89.91   | 92.88                 | 92.66             | 94.01    |         | 85.16                  | 87.88             | 86.22    |         | 77.65       |
|                  | 125        | 91.06                | 89.42             | 95.05    |         | 96.53                 | 95.94             | 97.01    |         | 92.23                  | 91.71             | 88.73    |         | 84.24       |
|                  | 150        | 96.48                | 94.37             | 96.24    |         | 97.80                 | 98.70             | 97.83    |         | 96.31                  | 96.60             | 95.13    |         | 93.72       |
|                  | 200        | 97.50                | 98.46             | 98.73    |         | 99.72                 | 99.44             | 99.66    |         | 98.01                  | 98.44             | 97.79    |         | 97.02       |
|                  | 250        | 99.20                | 99.00             | 99.90    |         | 99.90                 | 99.82             | 99.91    |         | 99.23                  | 99.21             | 99.50    |         | 98.79       |
| 300              | 99.81      | 99.46                | 99.74             |          | 99.99   | 100.00                | 99.99             |          | 99.81   | 99.81                  | 99.26             |          | 99.47   |             |
| Inarijoki        | 25         | 25.42                | 28.55             | 31.37    | 35.43   | 30.23                 | 30.90             | 31.37    | 34.70   | 23.32                  | 30.73             | 33.07    | 29.08   | 13.72       |
|                  | 50         | 51.80                | 57.57             | 54.10    | 69.05   | 52.80                 | 72.77             | 66.39    | 66.06   | 54.71                  | 62.87             | 64.12    |         | 29.79       |
|                  | 75         | 73.17                | 78.53             | 76.49    | 77.10   | 78.65                 | 88.06             | 82.46    | 89.26   | 75.61                  | 81.63             | 76.09    |         | 64.33       |
|                  | 100        | 85.19                | 84.83             | 85.32    | 92.31   | 93.81                 | 94.05             | 93.99    |         | 84.24                  | 89.27             | 84.88    |         | 70.35       |
|                  | 125        | 93.43                | 87.53             | 91.88    |         | 95.81                 | 96.03             | 95.70    |         | 90.51                  | 92.45             | 89.93    |         | 83.73       |
|                  | 150        | 95.66                | 96.17             | 92.62    |         | 98.55                 | 98.71             | 98.53    |         | 95.03                  | 97.47             | 94.07    |         | 84.16       |
|                  | 200        | 98.12                | 98.01             | 98.37    |         | 98.95                 | 99.71             | 99.56    |         | 98.24                  | 98.56             | 97.83    |         | 93.26       |
|                  | 250        | 99.53                | 99.33             | 99.27    |         | 99.98                 | 99.73             | 99.91    |         | 99.29                  | 99.10             | 98.86    |         | 98.99       |
| 300              | 99.83      | 99.86                | 99.82             |          | 100.00  | 99.97                 | 100.00            |          | 99.92   | 99.95                  | 99.53             |          | 99.59   |             |
| Tana Bru         | 25         | 22.57                | 29.84             | 25.40    | 31.71   | 26.51                 | 30.59             | 38.20    | 44.76   | 23.53                  | 28.60             | 34.68    | 34.37   | 14.88       |
|                  | 50         | 44.33                | 55.49             | 50.50    | 68.29   | 68.25                 | 73.14             | 68.01    | 64.21   | 45.61                  | 53.85             | 53.16    |         | 45.18       |
|                  | 75         | 60.98                | 68.34             | 69.59    | 83.16   | 82.34                 | 82.92             | 80.71    | 85.98   | 73.63                  | 77.84             | 75.54    |         | 56.14       |
|                  | 100        | 80.37                | 79.44             | 85.28    | 91.14   | 91.81                 | 91.75             | 87.61    |         | 84.80                  | 86.87             | 88.80    |         | 69.38       |
|                  | 125        | 83.82                | 83.60             | 91.95    |         | 93.60                 | 95.83             | 92.25    |         | 87.82                  | 92.68             | 91.59    |         | 78.14       |
|                  | 150        | 91.46                | 88.14             | 93.21    |         | 98.02                 | 97.07             | 97.49    |         | 93.27                  | 95.86             | 95.04    |         | 87.05       |
|                  | 200        | 96.98                | 94.76             | 97.32    |         | 99.58                 | 99.08             | 98.37    |         | 98.18                  | 98.15             | 99.16    |         | 93.91       |
|                  | 250        | 99.21                | 98.94             | 99.11    |         | 99.35                 | 99.68             | 99.43    |         | 99.30                  | 99.40             | 99.43    |         | 96.71       |
| 300              | 99.76      | 99.51                | 99.83             |          | 100.00  | 99.99                 | 99.85             |          | 99.79   | 99.87                  | 99.83             |          | 99.34   |             |
| Yläköngäs        | 25         | 28.86                | 35.60             | 36.74    | 47.45   | 50.08                 | 51.61             | 40.85    | 64.66   | 31.65                  | 44.95             | 39.21    | 60.44   | 19.55       |
|                  | 50         | 47.24                | 53.49             | 60.98    | 79.00   | 71.95                 | 83.44             | 73.41    | 79.18   | 72.50                  | 74.88             | 66.30    |         | 34.03       |
|                  | 75         | 69.26                | 72.07             | 67.49    | 88.24   | 81.99                 | 92.25             | 83.90    | 90.94   | 85.73                  | 88.53             | 77.44    |         | 63.46       |
|                  | 100        | 80.87                | 79.70             | 84.76    | 95.78   | 94.86                 | 95.94             | 94.10    |         | 90.71                  | 96.16             | 89.43    |         | 72.52       |
|                  | 125        | 91.81                | 87.84             | 89.42    |         | 95.10                 | 97.68             | 97.05    |         | 94.30                  | 96.32             | 96.00    |         | 74.10       |
|                  | 150        | 93.14                | 92.29             | 94.19    |         | 98.83                 | 98.91             | 96.94    |         | 96.33                  | 97.68             | 96.08    |         | 79.30       |
|                  | 200        | 98.02                | 98.25             | 97.59    |         | 99.13                 | 99.25             | 99.75    |         | 99.22                  | 99.57             | 99.23    |         | 93.29       |
|                  | 250        | 99.32                | 98.94             | 99.50    |         | 99.89                 | 99.95             | 99.64    |         | 99.29                  | 99.86             | 99.64    |         | 97.09       |
| 300              | 99.42      | 99.81                | 99.73             |          | 100.00  | 99.99                 | 99.85             |          | 99.88   | 99.99                  | 99.82             |          | 98.85   |             |
| Vestre Jakobselv | 25         | 22.18                | 28.53             | 49.67    | 42.64   | 58.86                 | 46.01             | 49.67    | 53.40   | 45.79                  | 44.03             | 33.17    | 52.77   | 24.79       |
|                  | 50         | 51.50                | 54.37             | 81.94    | 81.83   | 84.75                 | 81.50             | 81.94    | 81.99   | 67.28                  | 74.66             | 60.63    |         | 36.98       |
|                  | 75         | 71.82                | 74.29             | 89.50    | 86.93   | 90.16                 | 86.95             | 89.50    | 92.77   | 79.12                  | 83.75             | 83.57    |         | 52.55       |
|                  | 100        | 78.75                | 85.45             | 92.84    | 93.94   | 94.87                 | 92.78             | 92.84    |         | 88.94                  | 91.91             | 94.22    |         | 69.65       |
|                  | 125        | 92.04                | 86.49             | 97.22    |         | 97.12                 | 96.92             | 97.22    |         | 94.08                  | 94.40             | 92.31    |         | 78.51       |
|                  | 150        | 91.23                | 95.25             | 98.80    |         | 98.80                 | 97.90             | 98.80    |         | 97.06                  | 95.94             | 97.17    |         | 85.92       |
|                  | 200        | 96.72                | 97.08             | 99.45    |         | 99.80                 | 99.26             | 99.45    |         | 99.02                  | 99.12             | 98.67    |         | 96.05       |
|                  | 250        | 99.07                | 98.20             | 99.97    |         | 99.85                 | 99.13             | 99.97    |         | 99.71                  | 99.69             | 99.49    |         | 97.64       |
| 300              | 99.96      | 99.56                | 99.87             |          | 99.89   | 99.67                 | 99.87             |          | 99.97   | 99.98                  | 99.68             |          | 99.24   |             |
| Neiden           | 25         | 24.36                | 26.69             | 18.20    | 26.52   | 34.09                 | 35.39             | 18.20    | 28.51   | 33.11                  | 39.17             | 45.08    | 40.58   | 17.20       |
|                  | 50         | 43.93                | 50.95             | 50.51    | 58.54   | 54.90                 | 54.00             | 50.51    | 55.11   | 69.61                  | 71.68             | 59.11    |         | 46.26       |
|                  | 75         | 66.49                | 58.80             | 75.90    | 70.31   | 67.57                 | 70.69             | 75.90    | 80.38   | 81.68                  | 84.18             | 77.61    |         | 54.69       |
|                  | 100        | 80.72                | 79.62             | 84.69    | 82.60   | 84.47                 | 82.87             | 84.69    |         | 89.18                  | 91.66             | 87.92    |         | 69.31       |
|                  | 125        | 86.45                | 86.76             | 92.26    |         | 90.45                 | 88.39             | 92.26    |         | 94.35                  | 95.40             | 91.04    |         | 77.50       |
|                  | 150        | 93.49                | 90.86             | 96.15    |         | 93.23                 | 92.97             | 96.15    |         | 97.19                  | 96.43             | 95.79    |         | 84.04       |
|                  | 200        | 96.69                | 97.83             | 98.33    |         | 98.71                 | 97.15             | 98.33    |         | 98.66                  | 98.89             | 97.97    |         | 95.63       |
|                  | 250        | 98.89                | 98.48             | 99.54    |         | 99.50                 | 98.72             | 99.54    |         | 99.84                  | 99.33             | 98.86    |         | 97.42       |
| 300              | 99.20      | 99.64                | 99.97             |          | 99.91   | 99.89                 | 99.97             |          | 99.98   | 99.90                  | 99.87             |          | 98.59   |             |
| Titovka          | 25         | 24.43                | 31.50             | 22.26    | 30.36   | 26.11                 | 25.06             | 22.26    | 33.12   | 22.13                  | 32.59             | 27.25    | 29.11   | 13.98       |
|                  | 50         | 48.07                | 45.57             | 51.64    | 50.68   | 54.58                 | 42.34             | 51.64    | 66.64   | 55.75                  | 50.17             | 45.11    |         | 30.34       |
|                  | 75         | 64.92                | 61.59             | 70.91    | 71.05   | 68.71                 | 63.01             | 70.91    | 77.38   | 67.83                  | 72.13             | 62.34    |         | 39.49       |
|                  | 100        | 79.35                | 77.43             | 80.55    | 80.25   | 73.40                 | 74.33             | 80.55    |         | 82.09                  | 84.62             | 75.83    |         | 52.99       |
|                  | 125        | 86.19                | 85.17             | 87.36    |         | 89.92                 | 82.60             | 87.36    |         | 87.95                  | 87.28             | 81.45    |         | 69.38       |
|                  | 150        | 90.13                | 90.48             | 95.21    |         | 93.20                 | 89.95             | 95.21    |         | 92.62                  | 91.63             | 90.68    |         | 78.30       |
|                  | 200        | 94.90                | 95.63             | 97.24    |         | 96.93                 | 96.65             | 97.24    |         | 95.77                  | 96.13             | 95.11    |         | 86.31       |
|                  | 250        | 98.26                | 97.22             | 98.67    |         | 98.18                 | 96.88             | 98.67    |         | 98.87                  | 98.68             | 98.05    |         | 94.72       |
| 300              | 99.46      | 99.20                | 99.61             |          | 99.48   | 98.44                 | 99.61             |          | 99.59   | 99.67                  | 98.42             |          | 96.78   |             |

**Table S5. GSI accuracy (%) in individual populations (cont.).**

| Population        | No of SNPs | Population dataset I |                   |          |         | Population dataset II |                   |          | Population dataset III |                   |          | Random SNPs |        |        |
|-------------------|------------|----------------------|-------------------|----------|---------|-----------------------|-------------------|----------|------------------------|-------------------|----------|-------------|--------|--------|
|                   |            | global $F_{ST}$      | pairwise $F_{ST}$ | $\Delta$ | Outlier | global $F_{ST}$       | pairwise $F_{ST}$ | $\Delta$ | global $F_{ST}$        | pairwise $F_{ST}$ | $\Delta$ |             |        |        |
| Ura               | 25         | 25.24                | 37.96             | 41.82    | 32.96   | 27.88                 | 34.07             | 36.69    | 23.12                  | 34.17             | 36.09    | 39.70       | 30.96  | 14.66  |
|                   | 50         | 48.21                | 54.80             | 58.69    | 62.75   | 52.84                 | 57.06             | 57.42    | 57.56                  | 63.70             | 59.72    | 60.20       |        | 37.87  |
|                   | 75         | 70.40                | 71.46             | 74.44    | 77.60   | 70.03                 | 69.50             | 68.14    | 81.77                  | 82.65             | 77.65    | 71.87       |        | 56.92  |
|                   | 100        | 81.66                | 86.47             | 81.49    | 86.65   | 78.14                 | 81.29             | 83.25    |                        | 87.06             | 87.60    | 81.02       |        | 62.32  |
|                   | 125        | 89.49                | 89.35             | 88.05    |         | 89.98                 | 88.21             | 86.41    |                        | 93.08             | 93.47    | 88.34       |        | 82.68  |
|                   | 150        | 94.59                | 93.74             | 91.76    |         | 94.08                 | 93.34             | 95.09    |                        | 95.47             | 96.93    | 93.97       |        | 82.78  |
|                   | 200        | 97.94                | 97.50             | 96.36    |         | 97.40                 | 96.52             | 96.70    |                        | 98.32             | 98.57    | 97.29       |        | 93.44  |
|                   | 250        | 98.33                | 98.95             | 99.05    |         | 99.34                 | 99.38             | 97.84    |                        | 99.51             | 99.09    | 98.40       |        | 96.11  |
| 300               | 99.28      | 99.59                | 98.99             |          | 99.78   | 99.56                 | 99.72             |          | 99.88                  | 99.96             | 99.35    |             | 97.77  |        |
| Kola              | 25         | 33.06                | 28.55             | 40.09    | 47.86   | 35.45                 | 50.44             | 48.09    | 45.61                  | 24.14             | 31.25    | 34.26       | 26.95  | 18.27  |
|                   | 50         | 58.40                | 55.00             | 63.85    | 70.88   | 59.95                 | 67.98             | 66.62    | 69.41                  | 50.62             | 66.42    | 61.51       |        | 42.05  |
|                   | 75         | 76.99                | 79.09             | 77.08    | 88.65   | 84.40                 | 82.27             | 79.90    | 86.01                  | 76.05             | 81.04    | 74.68       |        | 61.22  |
|                   | 100        | 87.06                | 83.93             | 86.35    | 91.82   | 90.64                 | 93.76             | 91.06    |                        | 88.14             | 89.44    | 82.72       |        | 69.96  |
|                   | 125        | 92.32                | 92.87             | 93.29    |         | 96.14                 | 96.12             | 93.35    |                        | 92.67             | 93.99    | 91.33       |        | 83.89  |
|                   | 150        | 94.19                | 95.77             | 97.12    |         | 97.87                 | 97.64             | 96.86    |                        | 94.56             | 95.12    | 93.48       |        | 85.38  |
|                   | 200        | 98.40                | 99.07             | 98.15    |         | 99.61                 | 98.59             | 98.86    |                        | 97.93             | 98.42    | 96.30       |        | 93.69  |
|                   | 250        | 99.61                | 99.40             | 99.41    |         | 99.88                 | 99.79             | 99.39    |                        | 98.94             | 99.44    | 98.58       |        | 96.86  |
| 300               | 99.59      | 99.46                | 99.67             |          | 99.90   | 99.82                 | 99.95             |          | 99.77                  | 99.83             | 99.03    |             | 98.59  |        |
| Ponoi             | 25         | 57.94                | 72.03             | 76.33    | 60.87   | 41.43                 | 48.35             | 52.75    | 47.66                  | 35.96             | 45.40    | 40.19       | 40.02  | 28.35  |
|                   | 50         | 81.06                | 90.75             | 92.31    | 91.16   | 64.24                 | 76.40             | 79.64    | 74.89                  | 65.76             | 76.20    | 78.81       |        | 60.62  |
|                   | 75         | 92.18                | 95.95             | 96.11    | 95.22   | 81.14                 | 84.30             | 91.12    | 87.54                  | 89.96             | 90.47    | 88.29       |        | 72.01  |
|                   | 100        | 94.14                | 97.10             | 98.22    | 98.21   | 89.99                 | 92.16             | 92.62    |                        | 93.99             | 91.50    | 92.84       |        | 88.10  |
|                   | 125        | 97.13                | 98.52             | 98.83    |         | 93.22                 | 95.84             | 95.65    |                        | 93.35             | 95.17    | 97.03       |        | 92.93  |
|                   | 150        | 98.55                | 99.32             | 99.67    |         | 96.37                 | 97.34             | 97.56    |                        | 96.06             | 96.88    | 98.77       |        | 97.75  |
|                   | 200        | 99.33                | 99.95             | 99.63    |         | 98.92                 | 98.89             | 99.20    |                        | 98.53             | 98.87    | 99.65       |        | 98.15  |
|                   | 250        | 99.77                | 99.81             | 99.98    |         | 99.10                 | 99.58             | 99.76    |                        | 99.48             | 99.57    | 99.96       |        | 99.61  |
| 300               | 99.98      | 100.00               | 100.00            |          | 99.84   | 99.56                 | 99.98             |          | 100.00                 | 99.87             | 99.98    |             | 99.85  |        |
| Varzuga           | 25         | 71.99                | 87.86             | 89.26    | 69.94   | 44.86                 | 71.91             | 65.56    | 51.20                  | 41.90             | 67.57    | 72.36       | 51.72  | 49.28  |
|                   | 50         | 84.67                | 94.31             | 91.50    | 92.31   | 86.34                 | 82.27             | 86.62    | 85.62                  | 81.65             | 85.91    | 85.77       |        | 73.15  |
|                   | 75         | 93.89                | 96.76             | 97.79    | 96.47   | 87.97                 | 90.66             | 93.70    | 90.99                  | 91.10             | 95.33    | 92.45       |        | 83.73  |
|                   | 100        | 96.40                | 96.88             | 98.31    | 98.45   | 93.23                 | 95.15             | 93.46    |                        | 93.70             | 93.65    | 95.62       |        | 95.61  |
|                   | 125        | 98.04                | 98.67             | 99.28    |         | 94.56                 | 98.12             | 97.09    |                        | 95.21             | 97.50    | 98.06       |        | 95.09  |
|                   | 150        | 98.90                | 99.37             | 99.52    |         | 96.81                 | 98.24             | 98.22    |                        | 97.46             | 98.33    | 98.87       |        | 98.96  |
|                   | 200        | 99.74                | 99.79             | 99.85    |         | 98.61                 | 99.40             | 99.34    |                        | 98.59             | 98.65    | 99.62       |        | 97.90  |
|                   | 250        | 99.78                | 99.98             | 99.55    |         | 99.24                 | 99.92             | 99.57    |                        | 99.84             | 99.54    | 99.97       |        | 99.39  |
| 300               | 99.96      | 99.94                | 99.99             |          | 99.96   | 99.73                 | 99.65             |          | 99.79                  | 99.78             | 100.00   |             | 99.76  |        |
| Pechora<br>Pizhma | 25         | 96.11                | 91.92             | 92.04    | 55.90   | 67.58                 | 73.29             | 82.59    | 67.55                  | 73.26             | 72.76    | 72.85       | 62.16  | 80.68  |
|                   | 50         | 99.48                | 99.73             | 99.45    | 94.28   | 92.56                 | 96.58             | 97.91    | 91.84                  | 90.75             | 94.82    | 95.24       |        | 92.34  |
|                   | 75         | 99.99                | 100.00            | 99.78    | 97.49   | 99.11                 | 99.24             | 99.46    | 97.69                  | 97.68             | 99.03    | 99.65       |        | 96.15  |
|                   | 100        | 99.89                | 99.99             | 100.00   | 99.74   | 99.44                 | 99.98             | 99.95    |                        | 99.59             | 99.66    | 99.87       |        | 98.83  |
|                   | 125        | 100.00               | 100.00            | 100.00   |         | 99.99                 | 99.99             | 99.99    |                        | 99.99             | 99.79    | 99.99       |        | 99.77  |
|                   | 150        | 100.00               | 100.00            | 100.00   |         | 99.99                 | 100.00            | 100.00   |                        | 99.98             | 99.97    | 100.00      |        | 99.95  |
|                   | 200        | 100.00               | 100.00            | 100.00   |         | 100.00                | 100.00            | 99.96    |                        | 100.00            | 100.00   | 100.00      |        | 100.00 |
|                   | 250        | 100.00               | 100.00            | 100.00   |         | 100.00                | 100.00            | 100.00   |                        | 100.00            | 100.00   | 100.00      |        | 100.00 |
| 300               | 100.00     | 100.00               | 100.00            |          | 100.00  | 100.00                | 100.00            |          | 100.00                 | 100.00            | 100.00   |             | 100.00 |        |
| Pechora<br>Unya   | 25         | 97.86                | 98.96             | 96.98    | 77.32   | 78.41                 | 85.27             | 89.68    | 87.03                  | 84.63             | 83.46    | 83.18       | 79.12  | 76.46  |
|                   | 50         | 99.62                | 99.79             | 99.85    | 98.94   | 97.04                 | 97.87             | 97.98    | 97.36                  | 95.59             | 97.43    | 97.99       |        | 95.25  |
|                   | 75         | 99.99                | 99.99             | 99.92    | 99.37   | 99.26                 | 99.92             | 99.69    | 98.82                  | 97.63             | 98.62    | 99.89       |        | 98.25  |
|                   | 100        | 99.96                | 100.00            | 99.98    | 99.98   | 99.67                 | 99.76             | 99.98    |                        | 99.86             | 99.53    | 99.92       |        | 99.54  |
|                   | 125        | 100.00               | 100.00            | 99.95    |         | 99.94                 | 99.93             | 99.79    |                        | 99.99             | 99.92    | 99.99       |        | 99.88  |
|                   | 150        | 100.00               | 100.00            | 100.00   |         | 100.00                | 100.00            | 100.00   |                        | 100.00            | 100.00   | 100.00      |        | 100.00 |
|                   | 200        | 100.00               | 100.00            | 100.00   |         | 100.00                | 100.00            | 100.00   |                        | 100.00            | 100.00   | 99.99       |        | 100.00 |
|                   | 250        | 100.00               | 100.00            | 100.00   |         | 100.00                | 100.00            | 100.00   |                        | 100.00            | 100.00   | 100.00      |        | 100.00 |
| 300               | 100.00     | 100.00               | 100.00            |          | 100.00  | 100.00                | 100.00            |          | 100.00                 | 100.00            | 100.00   |             | 100.00 |        |
| Mezen<br>Pizhma   | 25         | 95.31                | 93.76             | 92.94    | 76.47   | 80.37                 | 91.64             | 90.82    | 72.67                  | 77.68             | 81.24    | 80.02       | 65.46  | 65.60  |
|                   | 50         | 99.42                | 99.98             | 99.74    | 94.67   | 98.37                 | 98.97             | 99.78    | 96.83                  | 94.78             | 96.90    | 97.97       |        | 93.64  |
|                   | 75         | 100.00               | 99.99             | 99.97    | 98.33   | 99.97                 | 99.95             | 99.87    | 98.94                  | 99.05             | 99.31    | 99.73       |        | 95.39  |
|                   | 100        | 100.00               | 99.99             | 100.00   | 99.79   | 99.97                 | 100.00            | 99.79    |                        | 99.89             | 99.99    | 99.99       |        | 99.63  |
|                   | 125        | 100.00               | 100.00            | 100.00   |         | 100.00                | 100.00            | 100.00   |                        | 100.00            | 99.89    | 100.00      |        | 99.88  |
|                   | 150        | 100.00               | 100.00            | 100.00   |         | 100.00                | 100.00            | 100.00   |                        | 100.00            | 100.00   | 100.00      |        | 99.98  |
|                   | 200        | 100.00               | 100.00            | 100.00   |         | 100.00                | 100.00            | 100.00   |                        | 100.00            | 100.00   | 100.00      |        | 100.00 |
|                   | 250        | 100.00               | 100.00            | 100.00   |         | 100.00                | 100.00            | 100.00   |                        | 100.00            | 100.00   | 100.00      |        | 100.00 |
| 300               | 100.00     | 100.00               | 100.00            |          | 100.00  | 100.00                | 100.00            |          | 100.00                 | 100.00            | 100.00   |             | 100.00 |        |

**Table S5.** GSI accuracy (%) in individual populations (cont.).

| Population | No of SNPs | Population dataset I |                   |          |         | Population dataset II |                   |          |         | Population dataset III |                   |          |         | Random SNPs |
|------------|------------|----------------------|-------------------|----------|---------|-----------------------|-------------------|----------|---------|------------------------|-------------------|----------|---------|-------------|
|            |            | global $F_{ST}$      | pairwise $F_{ST}$ | $\Delta$ | Outlier | global $F_{ST}$       | pairwise $F_{ST}$ | $\Delta$ | Outlier | global $F_{ST}$        | pairwise $F_{ST}$ | $\Delta$ | Outlier |             |
| Omega      | 25         | 98.63                | 99.56             | 98.88    | 89.12   | 81.08                 | 93.64             | 89.62    | 89.06   | 78.49                  | 94.26             | 96.92    | 91.88   | 84.53       |
|            | 50         | 100.00               | 100.00            | 99.99    | 98.57   | 95.78                 | 99.53             | 99.47    | 98.85   | 98.40                  | 99.53             | 99.95    |         | 98.38       |
|            | 75         | 100.00               | 100.00            | 100.00   | 99.63   | 99.98                 | 100.00            | 100.00   | 99.82   | 99.91                  | 99.99             | 100.00   |         | 99.86       |
|            | 100        | 100.00               | 100.00            | 100.00   | 100.00  | 100.00                | 100.00            | 100.00   |         | 99.99                  | 100.00            | 100.00   |         | 99.99       |
|            | 125        | 100.00               | 100.00            | 100.00   |         | 100.00                | 100.00            | 100.00   |         | 100.00                 | 100.00            | 99.99    |         | 100.00      |
|            | 150        | 100.00               | 100.00            | 100.00   |         | 100.00                | 100.00            | 100.00   |         | 100.00                 | 100.00            | 100.00   |         | 100.00      |
|            | 200        | 100.00               | 100.00            | 100.00   |         | 100.00                | 100.00            | 100.00   |         | 100.00                 | 100.00            | 100.00   |         | 100.00      |
|            | 250        | 100.00               | 100.00            | 100.00   |         | 100.00                | 100.00            | 100.00   |         | 100.00                 | 100.00            | 100.00   |         | 100.00      |
| 300        | 100.00     | 100.00               | 100.00            |          | 100.00  | 100.00                | 100.00            |          | 100.00  | 100.00                 | 100.00            |          | 100.00  |             |
| Narva      | 25         | 100.00               | 99.98             | 99.96    | 99.68   | 99.17                 | 99.99             | 99.83    | 98.32   | 98.09                  | 99.80             | 99.62    | 98.36   | 98.92       |
|            | 50         | 100.00               | 100.00            | 100.00   | 100.00  | 100.00                | 100.00            | 100.00   | 99.99   | 100.00                 | 100.00            | 100.00   |         | 99.96       |
|            | 75         | 100.00               | 100.00            | 100.00   | 100.00  | 100.00                | 100.00            | 100.00   | 100.00  | 100.00                 | 100.00            | 100.00   |         | 100.00      |
|            | 100        | 100.00               | 100.00            | 100.00   | 100.00  | 100.00                | 100.00            | 100.00   |         | 100.00                 | 100.00            | 100.00   |         | 100.00      |
|            | 125        | 100.00               | 100.00            | 100.00   |         | 100.00                | 100.00            | 100.00   |         | 100.00                 | 100.00            | 100.00   |         | 100.00      |
|            | 150        | 100.00               | 100.00            | 100.00   |         | 100.00                | 100.00            | 100.00   |         | 100.00                 | 100.00            | 100.00   |         | 100.00      |
|            | 200        | 100.00               | 100.00            | 100.00   |         | 100.00                | 100.00            | 100.00   |         | 100.00                 | 100.00            | 100.00   |         | 100.00      |
|            | 250        | 100.00               | 100.00            | 100.00   |         | 100.00                | 100.00            | 100.00   |         | 100.00                 | 100.00            | 100.00   |         | 100.00      |
| 300        | 100.00     | 100.00               | 100.00            |          | 100.00  | 100.00                | 100.00            |          | 100.00  | 100.00                 | 100.00            |          | 100.00  |             |

**Table S6.** GSI accuracy (%) of SNPs ranked using pairwise  $F_{ST}$  (dataset II) tested on 26 independent individual populations (DRYAD entry doi:10.5061/dryad.gm367, Bourret et al. 2012).

| Population            | Country       | Number of SNPs ranked by pairwise $F_{ST}$ |              |              |              |              |              | Number of randomly chosen SNPs |              |              |              |              |              |
|-----------------------|---------------|--------------------------------------------|--------------|--------------|--------------|--------------|--------------|--------------------------------|--------------|--------------|--------------|--------------|--------------|
|                       |               | 25                                         | 50           | 75           | 100          | 125          | 150          | 25                             | 50           | 75           | 100          | 125          | 150          |
| Tuloma                | Russia        | 73.93                                      | 86.00        | 94.72        | 97.49        | 98.45        | 98.66        | 40.92                          | 47.71        | 85.12        | 93.22        | 97.46        | 97.57        |
| Tana                  | Russia        | 73.82                                      | 86.29        | 96.39        | 98.68        | 98.57        | 98.73        | 11.11                          | 57.74        | 82.49        | 93.97        | 95.79        | 99.45        |
| Severnaya Dvina Emtsa | Russia        | 89.84                                      | 98.08        | 99.96        | 99.98        | 100.00       | 100.00       | 50.88                          | 89.33        | 95.46        | 99.12        | 99.72        | 100.00       |
| Ponoi Lebyazhya       | Russia        | 76.98                                      | 87.16        | 89.08        | 96.21        | 97.87        | 98.10        | 31.79                          | 63.00        | 84.35        | 92.09        | 96.10        | 96.57        |
| Varzuga Yapoma        | Russia        | 83.62                                      | 91.87        | 93.84        | 96.19        | 96.61        | 98.09        | 51.64                          | 68.81        | 89.63        | 94.18        | 97.77        | 97.18        |
| Pongoma               | Russia        | 92.49                                      | 97.65        | 99.79        | 99.96        | 100.00       | 100.00       | 48.01                          | 87.81        | 98.21        | 99.61        | 99.53        | 99.98        |
| Suma                  | Russia        | 96.34                                      | 98.45        | 99.90        | 99.99        | 100.00       | 100.00       | 48.28                          | 98.81        | 99.78        | 100.00       | 99.99        | 100.00       |
| Numedalslågen         | Norway        | 67.68                                      | 80.60        | 91.80        | 97.45        | 98.12        | 98.72        | 19.83                          | 64.28        | 79.43        | 91.43        | 94.28        | 97.14        |
| Gaula                 | Norway        | 60.00                                      | 71.88        | 86.64        | 91.54        | 93.92        | 94.91        | 24.74                          | 61.29        | 75.33        | 81.76        | 90.56        | 95.99        |
| Lærdalselva           | Norway        | 53.02                                      | 76.93        | 87.54        | 93.41        | 93.57        | 96.51        | 6.55                           | 61.99        | 79.77        | 85.09        | 90.83        | 96.22        |
| Dart                  | Great Britain | 32.39                                      | 56.92        | 74.96        | 85.10        | 88.11        | 91.49        | 23.55                          | 39.05        | 64.81        | 65.83        | 79.33        | 90.42        |
| Blackwater            | Great Britain | 22.07                                      | 38.40        | 59.01        | 71.26        | 77.44        | 83.07        | 16.46                          | 47.21        | 56.54        | 66.75        | 71.71        | 82.80        |
| Dionard               | Great Britain | 19.90                                      | 37.69        | 58.94        | 69.10        | 81.05        | 84.02        | 13.17                          | 47.48        | 64.41        | 64.63        | 84.06        | 84.37        |
| Foyle                 | Great Britain | 25.43                                      | 47.48        | 68.88        | 75.15        | 83.87        | 86.92        | 27.31                          | 52.99        | 72.02        | 82.93        | 87.27        | 86.14        |
| Moy                   | Great Britain | 29.70                                      | 63.64        | 74.84        | 86.68        | 93.21        | 94.63        | 19.02                          | 39.20        | 65.27        | 76.19        | 83.03        | 89.50        |
| North Esk             | Great Britain | 25.15                                      | 37.56        | 61.18        | 66.00        | 77.87        | 82.11        | 14.62                          | 36.31        | 46.15        | 57.03        | 73.27        | 79.72        |
| Tweed                 | Great Britain | 19.13                                      | 43.96        | 67.48        | 76.75        | 83.73        | 88.13        | 15.32                          | 43.93        | 67.66        | 65.69        | 78.62        | 81.99        |
| Loire                 | France        | 58.22                                      | 94.18        | 98.91        | 99.66        | 100.00       | 100.00       | 58.11                          | 86.68        | 96.40        | 99.56        | 99.95        | 100.00       |
| Cares                 | Spain         | 91.64                                      | 99.83        | 100.00       | 100.00       | 100.00       | 100.00       | 89.58                          | 99.77        | 99.99        | 100.00       | 100.00       | 100.00       |
| Piguena               | Spain         | 47.11                                      | 79.26        | 97.92        | 99.56        | 99.99        | 100.00       | 40.89                          | 84.10        | 97.46        | 99.00        | 99.80        | 99.74        |
| Narcea                | Spain         | 69.78                                      | 95.82        | 99.89        | 99.98        | 99.99        | 100.00       | 74.55                          | 93.51        | 99.14        | 99.89        | 99.59        | 99.74        |
| Selá                  | Iceland       | 69.64                                      | 95.21        | 99.39        | 98.95        | 99.81        | 99.99        | 47.54                          | 92.88        | 98.41        | 99.61        | 99.86        | 99.97        |
| Ölfusá                | Iceland       | 76.85                                      | 94.45        | 99.18        | 99.70        | 99.86        | 99.84        | 68.14                          | 93.16        | 97.99        | 99.97        | 99.78        | 99.90        |
| Tornionjoki           | Finland       | 87.03                                      | 98.23        | 99.76        | 99.80        | 99.99        | 99.93        | 42.78                          | 96.27        | 94.23        | 98.97        | 99.22        | 99.65        |
| Vindelälven           | Finland       | 85.28                                      | 97.37        | 99.88        | 99.97        | 99.97        | 100.00       | 52.45                          | 97.66        | 94.38        | 99.44        | 99.86        | 99.55        |
| Kunda                 | Estonia       | 83.32                                      | 99.36        | 99.99        | 100.00       | 100.00       | 100.00       | 59.63                          | 99.35        | 99.95        | 100.00       | 100.00       | 100.00       |
| <b>Overall</b>        |               | <b>61.94</b>                               | <b>79.01</b> | <b>88.46</b> | <b>92.25</b> | <b>94.69</b> | <b>95.92</b> | <b>38.34</b>                   | <b>71.16</b> | <b>84.01</b> | <b>88.69</b> | <b>92.98</b> | <b>95.14</b> |

**Table S7.** Estimated number of SNPs required to achieve 80%, 90%, 95% and 98% overall correct assignments for independent dataset of 26 European Atlantic salmon populations.

|     | <b>pairwise <math>F_{ST}</math><br/>(dataset II)</b> | <b>random</b> |
|-----|------------------------------------------------------|---------------|
| 80% | 50                                                   | 71            |
| 90% | 82                                                   | 101           |
| 95% | 120                                                  | 133           |
| 98% | 163                                                  | 163           |
